# Supplementary material
Source: MDPI journal article supplement (https://www.mdpi.com/2227-9717/10/12/2622)
Supplement: s1 [file s1 › processes-2028825-supplementary.pdf]

## Supplementary Material

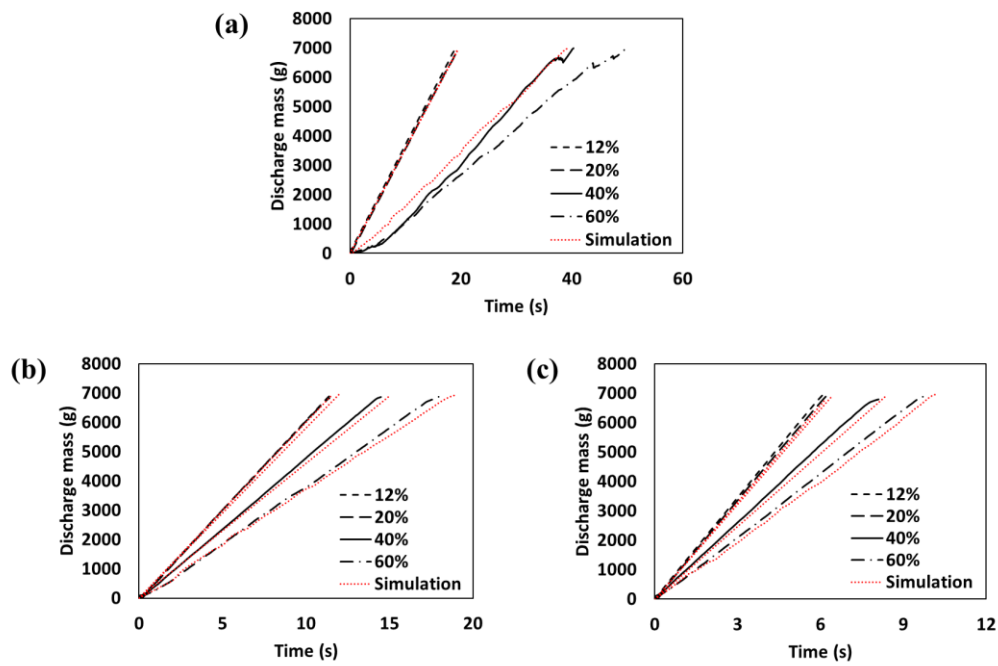

Figure S1. Mass profiles of soybeans with various moisture content during discharge at different orifice sizes obtained by experiments and simulations.
